# Supplementary material for: Reference Ranges of 8-Isoprostane Concentrations in Exhaled Breath Condensate (EBC): A Systematic Review and Meta-Analysis
Source: MDPI journal article supplement (doi:10.3390/ijms21113822), 2020-05-28

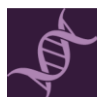

**Table S1.** Description of the included studies and the quality assessment results.

| Author, country, [Ref]*   | year | Study objectives                                                                                                                                                                                                                             | Population studied and number of participants                                   | Control population and sub-population                                              | Method of collection and analysis                                                                                                                                            | EBC | Main findings                                                                                                                                                      | Quality score and level |
|---------------------------|------|----------------------------------------------------------------------------------------------------------------------------------------------------------------------------------------------------------------------------------------------|---------------------------------------------------------------------------------|------------------------------------------------------------------------------------|------------------------------------------------------------------------------------------------------------------------------------------------------------------------------|-----|--------------------------------------------------------------------------------------------------------------------------------------------------------------------|-------------------------|
| Alfaro, 2007, USA, Ref 15 |      | To determine if a relationship exists between O <sub>3</sub> induced pulmonary function changes and the presence of inflammatory markers as measured in EBC samples obtained from O <sub>3</sub> -sensitive and nonsensitive human subjects. | O <sub>3</sub> -sensitive healthy adult volunteers(n=4, 2 males and 2 females). | O <sub>3</sub> -nonsensitive healthy adult volunteers(n=4, 2 males and 2 females). | EBC was obtained via a Jaeger EcoScreen system while wearing a noseclip. Each sampling period lasted 20 minutes and the frozen EBC samples were immediately stored at -80°C. |     | The results indicate that sensitive subjects have elevated arachidonic acid metabolites in EBCs compared to nonsensitive subjects after O <sub>3</sub> inhalation. | 11 Low                  |

|                                        |                                                                                                                                                                              |                                                                                                                                                                                                                                                                                                                                                                                                                                                 |                                                                                                                                        |                                                                                                                                                                                |                                                                                                                                                                         |               |
|----------------------------------------|------------------------------------------------------------------------------------------------------------------------------------------------------------------------------|-------------------------------------------------------------------------------------------------------------------------------------------------------------------------------------------------------------------------------------------------------------------------------------------------------------------------------------------------------------------------------------------------------------------------------------------------|----------------------------------------------------------------------------------------------------------------------------------------|--------------------------------------------------------------------------------------------------------------------------------------------------------------------------------|-------------------------------------------------------------------------------------------------------------------------------------------------------------------------|---------------|
| Andrianjafimasy, 2017, France, Ref 17* | To investigate the associations between biomarkers of response and damage related to oxidative stress, measured from different biological compartments, and asthma outcomes. | EGEA is a French cohort study with three surveys of over 20 years. The first EGEA survey (EGEA1) included cases with asthma, recruited in five chest clinics, their first-degree relatives and population-based controls, recruited in the early 1990s in five French cities (n=2047). A follow-up of the participants was completed in 2003–2007 (EGEA2), including 1601 subjects. The present analyses used data collected at EGEA2 (n=1388). | 774 participants without ever asthma, 54.4% were females and their mean age $\pm$ SD ( 46.2 $\pm$ 15.9). 20.7 % were current smokers.§ | EBC was collected using an RTube. After 15 min, EBC was immediately separated in aliquots and stored at $-80^{\circ}\text{C}$ according to standardised procedures.            | EBC isoprostanes seem to be involved in childhood-onset asthma and FLOPs (fluorescent oxidation products) seem to be linked to asthma expression and control in adults. | 8-19 Moderate |
| Antczak, 2002, Poland, Ref 19*         | To determine whether cys-LTs, PGE 2, LTB4 , and 8-isoprostane levels are increased in EBC in patients with AIA (aspirin-induced asthma) compared with patients with          | 31 patients with AIA (mean age, 41 $\pm$ 23 years; 23 female, nonsmokers), had no history of any aspirin-tolerant respiratory symptoms or mild to moderate asthma (ATA) (mean age, 47 $\pm$ 18years; 15 female, nonsmokers).                                                                                                                                                                                                                    | 16 healthy subjects (mean age, 45 $\pm$ 17 years, 7 female) had no history of any respiratory symptoms or respiratory infection.§      | EBC was collected in a tube installed in a polystyrene foam container filled with dry ice. Patients were asked to breathe out spontaneously for 10–15 minutes. Subjects wore a | Cys-LTs and 8-isoprostanes are elevated in EBC of steroid-naïve patients with AIA, and that cys-LTs are decreased                                                       | 8-12 Low      |

ATA (Aspirin-Tolerant Asthma) and healthy subjects and whether there are any differences between steroid-naïve and steroid-treated patients with AIA.

noseclip and samples in steroid-treated patients were stored at 80°C.

|                                |                                                                                                              |                                                                                                                                                                                                  |                                                                           |                                                                                                                                                                                |                                                                                                                                                                                                                                                                            |        |
|--------------------------------|--------------------------------------------------------------------------------------------------------------|--------------------------------------------------------------------------------------------------------------------------------------------------------------------------------------------------|---------------------------------------------------------------------------|--------------------------------------------------------------------------------------------------------------------------------------------------------------------------------|----------------------------------------------------------------------------------------------------------------------------------------------------------------------------------------------------------------------------------------------------------------------------|--------|
| Antczak, 2011, Poland, Ref 21* | To compare the contents of lipid mediators in EBC and BAL fluid in various patients undergoing bronchoscopy. | 37 patients undergoing bronchoscopy for clinical reasons (12 sarcoidosis, 12 COPD, 5 chronic cough, 6 lung cancer, ca planoepitheliale, 1 Wegener's granuloma and 1 sclerodermia) were included. | Ten healthy age-matched volunteers were also included as a control group. | EBC was collected using Ecoscreen (Jaeger, Germany). Patients were asked to breathe out spontaneously for 15 min. Each subject wore a noseclip. Samples were stored at -80° C. | To compare EBC and BALF in different lung diseases which demonstrated significant correlations between the levels of eicosanoids in BALF and EBC in patients with COPD and sarcoidosis. EBC may be useful in measuring inflammation in several inflammatory lung diseases. | 13 Low |
|--------------------------------|--------------------------------------------------------------------------------------------------------------|--------------------------------------------------------------------------------------------------------------------------------------------------------------------------------------------------|---------------------------------------------------------------------------|--------------------------------------------------------------------------------------------------------------------------------------------------------------------------------|----------------------------------------------------------------------------------------------------------------------------------------------------------------------------------------------------------------------------------------------------------------------------|--------|

|                                |                                                                                                                                                                                                                                                                             |                                                                                            |                                                                                                   |                                                                                                                                                                                        |                                                                                                                                                                                  |             |
|--------------------------------|-----------------------------------------------------------------------------------------------------------------------------------------------------------------------------------------------------------------------------------------------------------------------------|--------------------------------------------------------------------------------------------|---------------------------------------------------------------------------------------------------|----------------------------------------------------------------------------------------------------------------------------------------------------------------------------------------|----------------------------------------------------------------------------------------------------------------------------------------------------------------------------------|-------------|
| Antczak, 2012, Poland, Ref 18* | To determine eicosanoids, 8-isoprostane and H <sub>2</sub> O <sub>2</sub> of COPD patients hospitalized for an infectious exacerbation of COPD and treated with antibiotics, and to investigate the relationship between these inflammatory markers and clinical variables. | 16 patients with severe infectious exacerbations of COPD (mean age 64 ±12 years, 13 male). | 13 healthy age-matched controls (mean age 57 ±19 years, 10 male) were recruited for this study. § | EBC samples were obtained using a condensing tubing system, patients were asked to breathe through the collection tube for 15 min. The samples were stored at −80°C.                   | Eicosanoids and oxidants are increased in infectious exacerbations of COPD. They are also elevated in the airways of stable COPD patients compared to healthy subjects.          | 12 Low      |
| Ashmawi, 2018, Egypt, Ref 22*  | To measure 8-isoprostane levels in EBC of COPD patients and to evaluate the relation between EBC 8-isoprostane and the clinical and functional parameters of COPD.                                                                                                          | 80 COPD patients.                                                                          | 20 healthy controls (age 41.8±7.1, 16 males, 45% smokers). §                                      | A specially designed condenser was used to collect EBC samples, participants had been informed to breathe tidally for 15 min without a noseclip. EBC was obtained and stored at −70°C. | 8-Isoprostane is considered a sensitive and valuable biomarker measured in EBC, reflecting the intensity of the inflammatory process in COPD. 8-Isoprostane showed a significant | 18 Moderate |

positive correlation with COPD GOLD stage and negative correlation with lung function.

Barreto, 2006, To measure exhaled 18 healthy volunteer Non-smoking healthy EBC was collected using a The findings 14 Moderate  
Italy, Ref 23 biomarkers and test engine-workers serving volunteer engine-workers specially designed suggest that  
lung function in ship in the Italian Army (men, serving in the Italian condenser (EcoScreen®, smoking is a risk  
engineworkers before mean age 39.7±7.6 years, Army. They were 10 non- Jaeger, Wiirzburg, factor for airway  
and after an 8-hour range 23-56 years) who smokers (men, mean age Germany). Subjects were inflammation in  
patrol at sea, during had no history of 41.8, range 23-58 years). asked to breath tidally for ship engine-room  
which they lived in respiratory diseases, 15 minutes. EBC was workers.  
restricted quarters in normal spirometric collected in vials that were  
close contact with values and engine-work stored immediately at -  
powerful high-speed engagement lasting a 80°C.  
diesel engines. similar time. 8  
participants were current  
smokers (smoking  
history, 19.4 packyears).

|                       |                                                                                                                                                                                                                                                                                   |                                                                                               |                                                                                                                                                   |                                                                                                                                                                                                                |                                                                                                                                                                            |             |
|-----------------------|-----------------------------------------------------------------------------------------------------------------------------------------------------------------------------------------------------------------------------------------------------------------------------------|-----------------------------------------------------------------------------------------------|---------------------------------------------------------------------------------------------------------------------------------------------------|----------------------------------------------------------------------------------------------------------------------------------------------------------------------------------------------------------------|----------------------------------------------------------------------------------------------------------------------------------------------------------------------------|-------------|
| Biernacki, UK, Ref 25 | 2003, To assess markers of inflammation (LTB4) and oxidative stress (8-isoprostane) in EBC in patients with exacerbations of COPD and after treatment with antibiotics.                                                                                                           | 30 patients (19 men) with exacerbations of COPD were recruited from general practice clinics. | 12 control subjects (8 men) were recruited from staff working in the practices. All were non-smokers and had no significant past medical history. | EBC was collected by an Eco Screen condenser (Jaeger, Hoechberg, Germany). Patients were required to breathe tidally for 10 minutes while wearing a nose clip. Samples were stored in the laboratory at -70°C. | Non-invasive markers of inflammation and oxidative stress are increased during an infective exacerbation of COPD and only slowly recover after treatment with antibiotics. | 14 Moderate |
| Borrill, Ref 26       | 2008, UK, To compare pulmonary function and non-invasive biomarker data between smokers and non-smokers to gain a comprehensive understanding of the early physiological and inflammatory effects of cigarette smoking, and to investigate the relationships between non-invasive | 18 current smokers (mean age 46.4 [SD 9.6], 7 male, mean pack years 25.5 [SD 10.3])           | Ten lifelong non-smoking healthy controls (mean age 44.8 [SD 15.6], 4 male).                                                                      | EBC was collected during tidal breathing for 10 minutes (EcoScreen, Jaeger, Hoechberg, Germany) without a nose pe. Samples were frozen at -80 °C.                                                              | Smokers had evidence of small airway dysfunction, increased airway resistance, reduced lung compliance, airway neutrophilia and oxidative stress.                          | 11 Low      |

biomarkers in smokers.

|                        |                                                                                                                                                                                                                                                                                                             |                         |                                                                                                                                                                                                                  |                                                                                                                                                                                        |                                                                                                                                                                                   |             |
|------------------------|-------------------------------------------------------------------------------------------------------------------------------------------------------------------------------------------------------------------------------------------------------------------------------------------------------------|-------------------------|------------------------------------------------------------------------------------------------------------------------------------------------------------------------------------------------------------------|----------------------------------------------------------------------------------------------------------------------------------------------------------------------------------------|-----------------------------------------------------------------------------------------------------------------------------------------------------------------------------------|-------------|
| Brindicci, UK, Ref 27* | 2009, To investigate the effects of aminoguanidine on JNO and concentration of NO in peripheral lung (CALV) in COPO patients compared to healthy smokers and nonsmokers. The effect of aminoguanidine on NO products in EBC and in sputum was also investigated together with the effects on 8-isoprostane. | Ten patients with COPD. | Ten healthy smokers had no history of respiratory disease, had normal spirometry results, and had a smoking history > 10 pack-yrs. 10 healthy nonatopic nonsmokers with normal lung function were also enrolled. | Subjects were asked to breathe tidally through a mouthpiece connected to the condenser (EcoScreen) while wearing a nose clip for a period of 10 min. EBC samples were stored at -80°C. | The results suggest that the constitutive NOS isoform as well as iNOS might be involved in NO release and contribute to the high CALV and ONOO- production in patients with COPD. | 15 Moderate |
|------------------------|-------------------------------------------------------------------------------------------------------------------------------------------------------------------------------------------------------------------------------------------------------------------------------------------------------------|-------------------------|------------------------------------------------------------------------------------------------------------------------------------------------------------------------------------------------------------------|----------------------------------------------------------------------------------------------------------------------------------------------------------------------------------------|-----------------------------------------------------------------------------------------------------------------------------------------------------------------------------------|-------------|

|                                 |                                                                                                                                                                                                                            |                                                                                                             |                                                                                                                                                                            |                                                                                                                                                                                 |                                                                                                                                                                                                                                                                                                     |             |
|---------------------------------|----------------------------------------------------------------------------------------------------------------------------------------------------------------------------------------------------------------------------|-------------------------------------------------------------------------------------------------------------|----------------------------------------------------------------------------------------------------------------------------------------------------------------------------|---------------------------------------------------------------------------------------------------------------------------------------------------------------------------------|-----------------------------------------------------------------------------------------------------------------------------------------------------------------------------------------------------------------------------------------------------------------------------------------------------|-------------|
| Brussino, 2010, Italy, Ref 28*  | To investigate oxidative stress induced by allergen challenge in mild asthmatics, by measuring 8-isoprostane in EBC, and to examine its relationship with lipid mediators derived from arachidonic acid, cys-LTs and PGE2. | Patients: 12 non-smoking patients, sensitized to cat, with mild intermittent asthma.                        | 20 normal subjects matched for age (mean age 32, range 20–56 years) and gender (six male) acted as controls for baseline values.                                           | EBC collection was performed using the R Tube™. EBC collections were obtained after breathing for 10min and samples were immediately stored at 80°C.                            | The increase in EBC 8-isoprostane observed after allergen challenge indicates that allergen exposure increases airway oxidative stress in allergic asthma. The strict correlation between cys-LTs and 8-isoprostane underlines the relationship between allergic inflammation and oxidative stress. | 15 Moderate |
| Carpagnano, 2002, Italy. Ref 29 | To analyze the presence of 8-isoprostane, and interleukin (IL)-6, in EBC of OSA patients and subjects matched for obesity in order to see whether these                                                                    | The study population consisted of 18 OSA patients and 10 subjects matched for obesity who did not have OSA. | The group of control subjects consisted of 15 subjects (eight men; mean [SEM] age, 42[4]years), of normal weight (body mass index, < 27 kg/m <sup>2</sup> ), with no sleep | EBC was collected at 8 am by using a condenser (EcoScreen). Subjects were asked to breathe at a normal frequency and tidal volume, wearing a nose clip, for a period of 10 min. | Inflammation and oxidative stress are characteristic in the airways of OSA patients but not in obese subjects, and that their levels                                                                                                                                                                | 17 Moderate |



markers reflect the severity of OSA and whether they could be used to screen obese subjects with a high risk of developing OSA.

disturbances, and with EBC samples was stored at depend on the good health.§ 80°C immediately. severity of the OSA.

|                                  |                                                                                                                                                                                                                                                                                        |                                                                  |                                                                                                                                                                                                                   |                                                                                                                                            |                                                                                                                                                                                                    |             |
|----------------------------------|----------------------------------------------------------------------------------------------------------------------------------------------------------------------------------------------------------------------------------------------------------------------------------------|------------------------------------------------------------------|-------------------------------------------------------------------------------------------------------------------------------------------------------------------------------------------------------------------|--------------------------------------------------------------------------------------------------------------------------------------------|----------------------------------------------------------------------------------------------------------------------------------------------------------------------------------------------------|-------------|
| Carpagnano, 2004, Italy, Ref 30* | To investigate whether short term supplementary oxygen (28%) increases oxidative stress and inflammation in the airways we measured 8-isoprostane and IL-6 concentrations in EBC of healthy subjects and COPD patients after breathing room air and then after exposure to 28% oxygen. | 23 COPD patients who were all confirmed ex-smokers were studied. | 23 healthy subjects were non-smokers who had no respiratory symptoms or respiratory tract infection for >3 months before the study. Healthy subjects who were receiving oxygen were 18 and 5 were receiving air.§ | EBC was collected using a condenser (EcoScreen), with tidal breathing for 10 minutes. Condensate was collected on ice and stored at -70°C. | The findings suggest that short term supplementary oxygen may enhance oxidative stress and inflammation in the airways. Whether this happens with long term oxygen therapy needs to be determined. | 15 Moderate |
|----------------------------------|----------------------------------------------------------------------------------------------------------------------------------------------------------------------------------------------------------------------------------------------------------------------------------------|------------------------------------------------------------------|-------------------------------------------------------------------------------------------------------------------------------------------------------------------------------------------------------------------|--------------------------------------------------------------------------------------------------------------------------------------------|----------------------------------------------------------------------------------------------------------------------------------------------------------------------------------------------------|-------------|

|                           |                                                                                                                                                                                                                                                                       |                                                                                                            |                                                                                                                                                                                                                                                                                                                                         |                                                                                                                                                                                                              |                                                                                                                                                                                       |             |
|---------------------------|-----------------------------------------------------------------------------------------------------------------------------------------------------------------------------------------------------------------------------------------------------------------------|------------------------------------------------------------------------------------------------------------|-----------------------------------------------------------------------------------------------------------------------------------------------------------------------------------------------------------------------------------------------------------------------------------------------------------------------------------------|--------------------------------------------------------------------------------------------------------------------------------------------------------------------------------------------------------------|---------------------------------------------------------------------------------------------------------------------------------------------------------------------------------------|-------------|
| Chan, Australia, Ref 31   | 2009, to measure specific oxidative stress markers in the EBC of subjects, including H <sub>2</sub> O <sub>2</sub> , 8-isoprostane, pH, and antioxidant capacity.                                                                                                     | Patients with newly diagnosed lung cancer before treatment were recruited from the oncology clinic (n=21). | The control group comprised nonsmokers (n=21), smokers (n=16), and exsmokers (n=13), defined as not having smoked for at least 1 year. The control group included subjects without lung cancer, and no history of chronic obstructive pulmonary disease (COPD) or other respiratory conditions matched for socioeconomic and age group. | EBC was obtained by breathing into a nonsiliconized glass collection device. Subjects breathed tidally for 10 to 15 minutes. The samples were stored under argon at -80°C.                                   | The findings suggest oxidative stress is implicated in the development of lung cancer and may be an early marker of the disease.                                                      | 15 Moderate |
| Ciebiada, Poland, Ref 34* | 2012, To assess the levels of cys-LTs, PGE <sub>2</sub> , LTB <sub>4</sub> and 8-isoprostane in the EBC of patients with primary lung cancer and to compare with those detected in the bronchoalveolar lavage fluid (BALf) of patients diagnosed with NSCLC and those | 17 included patients with diagnosis of lung cancer.                                                        | Ten healthy smokers controls (5 male, mean age ± SD 49.9 ± 15.2) and 12 healthy nonsmokers controls (7 male, mean age ± SD 37.8 ± 13.1).                                                                                                                                                                                                | Patients were instructed to breathe for 10–15 minutes while wearing a nose clip. The condensate was collected by a commercially available condenser (EcoScreen). Condensate was immediately stored at -80°C. | Since cys-LT, LTB <sub>4</sub> and 8-isoprostane concentrations in EBC from patients with lung cancer reflect their concentrations in BALf, they may serve as a possible non-invasive | 15 Moderate |

detected in EBC of healthy control.

method to monitor the disease and to assess the effectiveness of therapy.

Cruz, 2009, Spain, To determine whether NA  
Ref 35 there are significant age-associated differences in pH values, 8-isoprostane, and nitrogen oxides in EBC from a population of healthy adults in different age groups.

75 healthy, nonsmoking EBC was collected using The results subjects participated in EcoScreen). Subjects indicate that pH the study. Subjects breathed tidally while and 8-isoprostane were stratified into five wearing nose clips. The levels in EBC age groups: 18 to 29 years aliquots, used for show a (group 1), 30 to 39 years measuring nitrite, nitrate, relationship with (group 2), 40 to 49 years and 8-isoprostane were age. Thus, values (group 3), .50 to .59 years immediately were stored at obtained in (group 4), and 60 to 80 °C. studies with years (group .5). Each control groups group has 15 subjects. may require adjustment for these factors.

16 Moderate

|                               |                                                                                                                                                                                                                                                                                         |                                                                                                                                                                                                                                                                                                                                         |                                                                                                                                                          |                                                                                                                                                                                       |                                                                                                                                                                                                                                                                            |             |
|-------------------------------|-----------------------------------------------------------------------------------------------------------------------------------------------------------------------------------------------------------------------------------------------------------------------------------------|-----------------------------------------------------------------------------------------------------------------------------------------------------------------------------------------------------------------------------------------------------------------------------------------------------------------------------------------|----------------------------------------------------------------------------------------------------------------------------------------------------------|---------------------------------------------------------------------------------------------------------------------------------------------------------------------------------------|----------------------------------------------------------------------------------------------------------------------------------------------------------------------------------------------------------------------------------------------------------------------------|-------------|
| Do, 2008, Canada, Ref 36      | To evaluate the relationship, among grain elevator workers, between EBC five terminal grain biomarkers of airway acidity (pH and NH <sub>4</sub> ) and oxidative stress (8-isoprostane) on the one hand, and personal characteristics and missing exposure work exposures on the other. | This study was nested in a larger cross-sectional survey of employees in elevators. There were 82 eligible participants; 4 did not show up for testing and 3 were excluded from analysis because of characteristics and missing exposure measurements, leaving 75 participants for this analysis (6 females, 15% smokers, mean age=47). | NA                                                                                                                                                       | EBC collection was performed using the R-Tube. EBC collection was performed for 15 minutes at a tidal breathing rate.                                                                 | Chronic exposures are associated with airway acidity, whereas acute exposures are more closely associated with oxidative stress. The collection of EBC may contribute to predicting the pathological state of the airways of workers exposed to acute and chronic factors. | 18 Moderate |
| Alvarez, 2016, Spain, Ref 16* | To measure the concentration of 8-isoprostane as a biomarker of OS in a group of patients with obstructive sleep apnea-hypopnea syndrome (OSAS), and                                                                                                                                    | The cases (n=30) were consecutive patients with OSAS diagnosed.                                                                                                                                                                                                                                                                         | The control group (n=12, 7 females, mean age±SD 42±7) comprised non-smoking patients without prior respiratory, local or systemic inflammatory disease.§ | EBC was collected using the EcoScreen II device. The technique is performed in a sitting position, with a nose clip and tidal breathing for 15 min. The samples were stored at -70°C. | Snoring, and not OSAS severity, could be the underlying phenomenon presence of local OS measured in the airway of                                                                                                                                                          | 15 Moderate |

compared with a control group.

patients with OSAS.

Font-Ribera, 2010, To explore short-term respiratory changes in healthy adults after swimming in an indoor chlorinated swimming pool by measuring lung function and a wide range of biomarkers that may reflect different mechanisms of effect. 50 subjects were recruited for the study, 2 subjects were excluded with history of asthma for the present analysis, resulting in a sample of 48 subjects. Most participants were women (65%) and were highly educated (92% with university studies), with an average age ( $\pm$  SD) of  $30 \pm 6.1$  years. NA

EBC was obtained using an EcoScreen condenser. Samples were obtained through breathing at normal frequency and tidal volume until a total expiratory volume of 180 L was achieved. All samples were lyophilized and stored at  $-80^{\circ}$ . We detected a slight increase in serum CC16, a marker of lung epithelium permeability, in healthy adults after they swam in an indoor chlorinated pool. Exercise and DBP exposure explained this association, without involving inflammatory mechanisms.

15 Moderate

|                           |                                                                                                                                                                                                                                                                                                            |                                                                                                                                                                           |                                                                                                                                                                                                                                     |                                                                                                                                                                                                            |             |
|---------------------------|------------------------------------------------------------------------------------------------------------------------------------------------------------------------------------------------------------------------------------------------------------------------------------------------------------|---------------------------------------------------------------------------------------------------------------------------------------------------------------------------|-------------------------------------------------------------------------------------------------------------------------------------------------------------------------------------------------------------------------------------|------------------------------------------------------------------------------------------------------------------------------------------------------------------------------------------------------------|-------------|
| Goldoni, Italy, Ref 39*   | 2013, To compare the NA concentration of several biomarkers in traditionally collected whole EBC (W-EBC) and in fractionated EBC (A-EBC), in which only the exhaled air with a CO <sub>2</sub> concentration above C50 of the saturation value is condensed. A specific device was designed to perform it. | Enrolled subjects were 45 (6 smokers, 39 nonsmokers), they did not present any pulmonary symptom or a history of pulmonary disease, and all had normal lung spirometry. § | EBC collection was performed with TURBO-DECCS, the subjects were asked to tidally breath inside the condenser for 15 min without a nose clip. Samples were aliquoted and stored at -80 °C.                                          | The fractionation of exhaled air may be promising in clinical and occupational medicine.                                                                                                                   | 14 Moderate |
| Gratziou, Greece, Ref 40* | 2008, To investigate breath markers of as and airway inflammation in patients with seasonal allergic rhinitis (SAR) with and without concomitant asthma.                                                                                                                                                   | 23 patients with a history of SAR for the last two years took part in the study.                                                                                          | Healthy subjects (3 males, mean age $\pm$ SD 36 $\pm$ 8, EcoScreen, subjects were asked to breathe at normal frequency and tidal volume, wearing a nose clip, for a period of 15 min and aliquots were stored immediately at -80°C. | OS markers were decreased at normal levels out of pollen season. Natural allergen exposure induces OS and airway inflammation in patients with SAR who have no clinical signs of lower airway involvement. | 14 Moderate |

|                          |                                                                                                                                                                                         |                                                                                                                                                                                       |                                                                                                 |                                                                                                                                                        |                                                                                                                                                                                                                                                      |             |
|--------------------------|-----------------------------------------------------------------------------------------------------------------------------------------------------------------------------------------|---------------------------------------------------------------------------------------------------------------------------------------------------------------------------------------|-------------------------------------------------------------------------------------------------|--------------------------------------------------------------------------------------------------------------------------------------------------------|------------------------------------------------------------------------------------------------------------------------------------------------------------------------------------------------------------------------------------------------------|-------------|
| Hakim, Isreal, Ref 41    | 2011, To evaluate the short-term effects of a single, 30-min session of water pipe smoking (WPS) on COHb levels and cardiorespiratory and airway inflammatory parameters in volunteers. | Eligible subjects were older than 18 years and had previously smoked from WPs. 45 subjects (30 men, 15 women) were included. Their mean age±SD 32.35±23.36, Cigarettes smokers (n=8). | NA                                                                                              | EBC samples were collected in Rtubes. The collected EBCs were stored at -80°C until analysis.                                                          | one session of WPS causes acute biologic changes that might result in marked health problems. It adds to the limited evidence that WPS is harmful and supports interventions to control the continuing global spread of WPS, especially among youth. | 15 Moderate |
| Heinicke, Chile, Ref 42* | 2009, To determine oxidative stress response parameters upon exercise or rest during a 6-week-sojourn at moderate altitude (2,800 m).                                                   | Ten Athletes (four females and six males; mean age±SD, 24.7 ± 1.3 years), who usually live at sea level.§                                                                             | Five sedentary control subjects (five males, 30.2 ± 3.3 years), who usually live at sea level.§ | EBC was collected with a self-constructed device.EBC was collected during a period of 20 min and immediately stored in liquid nitrogen until analyzed. | A stay at moderate altitude for up to 6 weeks increases markers of oxidative stress in EBC independent of additional endurance training. Notably, this oxidative                                                                                     | 10 Low      |

|                                                    |                                                                                                                                                                                                                                                   |                                                                                                                                                                                                                               |                                                                                                                                                                                                                                                                               |                                                                                                                                                                   |             |
|----------------------------------------------------|---------------------------------------------------------------------------------------------------------------------------------------------------------------------------------------------------------------------------------------------------|-------------------------------------------------------------------------------------------------------------------------------------------------------------------------------------------------------------------------------|-------------------------------------------------------------------------------------------------------------------------------------------------------------------------------------------------------------------------------------------------------------------------------|-------------------------------------------------------------------------------------------------------------------------------------------------------------------|-------------|
|                                                    |                                                                                                                                                                                                                                                   |                                                                                                                                                                                                                               |                                                                                                                                                                                                                                                                               | stress is still<br>detected 3 days<br>upon return to sea<br>level.                                                                                                |             |
| Hoffmeyer, 2009,<br>Germany, Ref 43*               | To compare the NA<br>temperature-<br>controlled ECoScreen2<br>with ECoScreen.                                                                                                                                                                     | 16 non-smoking healthy<br>volunteers, 9 males, age<br>median(range) 39(26-62)§                                                                                                                                                | EBC was collected in each<br>subject between 8 and 12<br>a.m. In this study the<br>mediator specific<br>enzyme<br>ECoScreen and immunoassays<br>ECoScreen2. The subjects<br>used a nose-clip and EBC<br>was collected for exactly 10<br>min. Samples were stored<br>at -70°C. | 11 Low                                                                                                                                                            |             |
| Marcin<br>Kazmierczak,<br>2015, Poland, Ref<br>46* | To compare the EBC<br>and serum CVD were<br>allocated to<br>concentrations of CRP,<br>IL-8, LTB4 and 8-<br>isoprostane in COPD<br>patients with those of<br>healthy individuals,<br>and to assess their<br>concentration in<br>COPD patients with | 24 COPD patients with<br>CVD were allocated to<br>group A(3 females, mean<br>age $\pm$ SD 67.75 $\pm$ 9.3) and 20<br>COPD patients without<br>CVD were assigned to<br>group B (10 females,<br>mean $\pm$ SD 65.05 $\pm$ 8.0). | 16 healthy individuals as<br>controls (12 females, mean<br>age $\pm$ SD 53.1 $\pm$ 7.31)§§<br>EBC was collected using<br>the EcoScreen. Patients<br>breathed for 10-15 minutes.<br>Condensate was<br>immediately frozen and<br>stored at -20°C.                               | Although<br>systemic<br>inflammation<br>coexists with<br>COPD, it is not<br>elevated in COPD<br>patients with<br>CVD. Since this<br>phenomenon may<br>result from | 14 Moderate |



CVD and those without cardiovascular complications.

treatment with statins, future studies should state whether COPD patients could benefit from the additional statin therapy.

- Ko, 2006, Hong Kong, Ref 47\* To assess the level of oxidative stress and inflammation in the airway non-invasively by collection of EBC. The levels of 8-isoprostane, GRO $\alpha$  and MCP-1 were measured in both COPD patients and controls and the relationship between their levels, lung function and dyspnoea score was assessed.
- 32 COPD patients (28 males, mean age 72 $\pm$ 9, non-smoking exsmokers) were recruited.
- Age and sex matched EBC was collected using EcoScreen, the collection level, but not GRO $\alpha$  and MCP-1, in EBC was increased in COPD patients with poorer lung function. This suggests an increased oxidative stress in the airway in patients with more severe COPD.
- 19 Moderate

|                                 |                                                                                                                                                                                       |                                                                                                                                                                                                                                                                                          |                                                               |                                                                                                                                                                                     |                                                                                                                                                                                               |             |
|---------------------------------|---------------------------------------------------------------------------------------------------------------------------------------------------------------------------------------|------------------------------------------------------------------------------------------------------------------------------------------------------------------------------------------------------------------------------------------------------------------------------------------|---------------------------------------------------------------|-------------------------------------------------------------------------------------------------------------------------------------------------------------------------------------|-----------------------------------------------------------------------------------------------------------------------------------------------------------------------------------------------|-------------|
| Koskela, 2012, Finland, Ref 49* | To investigate the associations of these levels with cough related quality of life and cough sensitivity to hypertonicity and hyperpnoea .                                            | 32 subjects with stable asthma were recruited. All subjects completed the study but due to technical reasons, EBC analysis could not be performed in six asthmatic subjects. Thus, the present analysis consists of the results of 26 asthmatic (7 males, mean age±SD 42±3, 7 smokers) . | Ten Healthy subjects (2 males, mean±SD 39±6, nonsmokers)§     | EBC was collected utilizing Ecoscreen. The subjects wore a nose clip. The duration of collection was 10 min, using tidal breathing. The condensate was immediately stored in -70°C. | Airway oxidative stress may be associated with cough severity and measured cough sensitivity in asthma.                                                                                       | 16 Moderate |
| Koskela, 2013, Finland, Ref 48* | To investigate whether airway oxidative stress is present also in subjects without doctor's diagnosis of any chronic lung disorders but who seek medical advice due to chronic cough. | 43 subjects with chronic cough (32 females, mean age 55.6).                                                                                                                                                                                                                              | 15 healthy, non-smoking subjects (11 females, mean age 52.7)§ | EBC was collected utilizing Ecoscreen. The subjects sat and wore a noseclip. The duration of collection was 10 minutes, the condensate was stored in - 70°C.                        | Chronic cough seems to be associated with airway oxidative stress in subjects with chronic cough but without chronic lung diseases. This finding may help to develop novel antitussive drugs. | 15 Moderate |

|                                 |                                                                                                                                                                                                                                                                                                                |                                                                                                                                                                                                                                                         |                                                                                                                                                        |                                                                                                                                                                                |                                                                                                                                                             |             |
|---------------------------------|----------------------------------------------------------------------------------------------------------------------------------------------------------------------------------------------------------------------------------------------------------------------------------------------------------------|---------------------------------------------------------------------------------------------------------------------------------------------------------------------------------------------------------------------------------------------------------|--------------------------------------------------------------------------------------------------------------------------------------------------------|--------------------------------------------------------------------------------------------------------------------------------------------------------------------------------|-------------------------------------------------------------------------------------------------------------------------------------------------------------|-------------|
| Koskela, 2015, Finalnd, Ref 50* | To assess whether dust exposure in foundry work is associated with airway inflammation. Inflammation was assessed by measuring alveolar and bronchial NO output and analyzing levels of inflammatory markers in EBC (8-isoprostane and LTB4) and in serum samples (MPO, E-selectin, IL-6, IL-8, IgE, and CRP). | A cross-sectional study was conducted in two Finnish foundries of the same company: one was a steel cast foundry and the other an iron cast foundry. The study population consisted of 476 people: 322 exposed (males). The participation rate was 78%. | Control Persons (154 unexposed workers): Age Mean (SD) 44.1 (9.7), all males. The participation rate was 78%.§                                         | EBC was collected during 15 min of tidal breathing by the Ecoscreen condenser while wearing nose clips. The samples were stored at -70°C until assayed.                        | Dust exposure in foundry work may induce both systemic and alveolar inflammation.                                                                           | 17 Moderate |
| Kostikas, 2002, Greece, Ref 51* | To determine the amounts of pH in the expired breath condensate of patients with asthma, COPD, and bronchiectasis. They investigated the relationship between pH and the inflammatory process, oxidative stress,                                                                                               | Patients with asthma(n=40), COPD (n=20), and bronchiectasis (n=20).                                                                                                                                                                                     | Control Subjects(n=10): All normal subjects were nonsmokers and had a negative history of allergy, their age mean(SD): 34 (8), 7 males and 3 females.§ | subjects were comfortably seated in a chair. They were wearing nose clips and breathed in a relaxed manner (tidal breathing) for 15 minutes. Samples were and stored in -70°C. | The pH of the expired breath condensate might be a simple, noninvasive, inexpensive, and easily repeatable procedure for the evaluation of the inflammatory | 15 Moderate |

metabolism, and lung  
function tests.

process in airway  
diseases.

|                           |                                                                                                                                                                                                                      |                                                                                                                                                                                                                                         |                                                                                                                                                                                                      |                                                                                                                           |                                                                                                                                                                   |        |
|---------------------------|----------------------------------------------------------------------------------------------------------------------------------------------------------------------------------------------------------------------|-----------------------------------------------------------------------------------------------------------------------------------------------------------------------------------------------------------------------------------------|------------------------------------------------------------------------------------------------------------------------------------------------------------------------------------------------------|---------------------------------------------------------------------------------------------------------------------------|-------------------------------------------------------------------------------------------------------------------------------------------------------------------|--------|
| Kurti, 2017, USA, Ref 52* | To assess the NA postprandial airway and systemic 8-isoprostane responses to a high-fat meal (HFM) and a more true-to-life moderate-fat meal (MFM) in insufficiently active male participants.                       | Eight college-aged males who did not engage regularly in any planned physical activity per week, and did not meet physical activity guidelines (moderate-to-vigorous physical activity (MVPA) less than 150 minutes per week.§          | RTubes were used for EBC measurements. Participants performed tidal breathing for 10 minutes while seated, with feet flat on the floor and wearing a nose-clip. Samples immediately frozen at -60°C. | Following a HFM and MFM, 8-isoprostane increases systemically, however airway 8-isoprostane does not change.              | 14 Moderate                                                                                                                                                       |        |
| Kurti, 2018, USA, Ref 12* | To determine whether changes in airway 8-isoprostane generation were correlated with changes in lung function. We hypothesized that older women (OW) would have elevated airway 8-isoprostane responses from pre- to | §36 individuals were recruited by age to participate in the study (12 OW, 12 OM, and 12 YC). The OW were post-menopausal and matched for age with the OM and older women (OW) for habitual physical activity level with the OM and YC.§ | Young controls (6 males, mean age±SD 21.5 ± 2.3), Older women (n=12, mean age±SD 64.1 ± 4.1) and older men (n=12, mean age±SD 66.2 ± 4.1).§                                                          | Subjects performed tidal breathing for 10 minutes into an Rtube, the samples were frozen in a -60 degree Celsius freezer. | The OW exhibited a greater airway 8-isoprostane response to exhaustive exercise compared to OM and YC, which may suggest that sex differences in oxidative stress | 13 Low |

post-exercise  
compared to older men  
(OM) and younger  
control (YC).

generation  
following  
exhaustive  
exercise may  
provide a  
mechanistic  
rationale for sex  
differences in late-  
onset respiratory  
diseases.

|                                  |                                                                                                                                                                                                                                                                                |                                                                                                                                                                         |                                                                                                                                         |                                                                                                                                             |             |
|----------------------------------|--------------------------------------------------------------------------------------------------------------------------------------------------------------------------------------------------------------------------------------------------------------------------------|-------------------------------------------------------------------------------------------------------------------------------------------------------------------------|-----------------------------------------------------------------------------------------------------------------------------------------|---------------------------------------------------------------------------------------------------------------------------------------------|-------------|
| Lehtonen, 2007, Finland, Ref 54* | To determine whether 15 patients with asbestosis (all men) of mean age 67 years and 15 patients with asbestosis have altered bronchial or alveolar NO output or increased concentrations of inflammatory markers LTB4 and/or 8-isoprostane in their exhaled breath condensate. | 15 patients with 15 age-matched healthy male volunteers of mean age 63 years with normal spirometric values(nonsmokers)§ were recruited. All subjects were non-smokers. | EBC was collected during 15 min of tidal breathing with Ecoscreen condenser while wearing nose clips. The samples were stored at -70°C. | Patients with asbestosis have an increased alveolar NO concentration and high levels of leukotriene B4 and 8-isoprostane in exhaled breath. | 19 Moderate |
|----------------------------------|--------------------------------------------------------------------------------------------------------------------------------------------------------------------------------------------------------------------------------------------------------------------------------|-------------------------------------------------------------------------------------------------------------------------------------------------------------------------|-----------------------------------------------------------------------------------------------------------------------------------------|---------------------------------------------------------------------------------------------------------------------------------------------|-------------|

|                      |                                                                                                                                                                                                                                                                   |                                                                                                                                                                                                                                                                                                                                                        |             |
|----------------------|-------------------------------------------------------------------------------------------------------------------------------------------------------------------------------------------------------------------------------------------------------------------|--------------------------------------------------------------------------------------------------------------------------------------------------------------------------------------------------------------------------------------------------------------------------------------------------------------------------------------------------------|-------------|
| Leung, China, Ref 55 | 2005, To investigate the relationship between EBC pH and clinical, atopic, and spirometric parameters, exhaled nitric oxide levels (FeNO), and EBC concentrations of 8-isoprostane, LTB <sub>4</sub> , and cysteinyl-leukotrienes (cys-LT) in asthmatic children. | Patients aged 7–18 years, Nine healthy, EBC was collected using pH in non-smoking adults (five EcoScreen (Jaeger) or deaerated EBCs                                                                                                                                                                                                                    | 13 Low      |
| Li, China, Ref 56*   | 2007, To identify the best biomarker, either subjects, 22 mild OSAS, 22 moderate OSAS, and 24 severe OSAS. be used to predict severity of OSAS with the best cost-effectiveness ratio.                                                                            | 22 non-OSAS control subjects (14 males, mean±age SD 43±93) and 10 healthy smoker subject(10 males, mean±age 41±4)§ EBC was collected using a Ecoscreen condenser, after the completion of sleep monitoring in the morning before 8 a.m. Subjects were asked to breathe while wearing a nose clip, for a period of 15 min. Samples were stored at -80°C | 17 Moderate |
| Liou, China, Ref 57  | 2017, To assess whether global DNA methylation levels, TiO <sub>2</sub> handling workers, oxidative stress markers of nucleic                                                                                                                                     | 87 workers, which Non-exposed control workers (n = 43), 18 men and 25 women, their age mean±SD 37.95±8.94.                                                                                                                                                                                                                                             | 15 Moderate |

acids (8-OHdG) in workers, 30 ITO  
urine and white blood handlingworkers.  
cell (WBC), and EBC 8-  
isoprostanewere  
associated with  
nanomaterial  
exposure.

damage, and lipid  
peroxidation.

|                               |                                                                                                                                                                                                                                                                                                                                  |                                                                         |                                                                                                                                                                                    |                                                                                                                                                                                                                                                       |             |
|-------------------------------|----------------------------------------------------------------------------------------------------------------------------------------------------------------------------------------------------------------------------------------------------------------------------------------------------------------------------------|-------------------------------------------------------------------------|------------------------------------------------------------------------------------------------------------------------------------------------------------------------------------|-------------------------------------------------------------------------------------------------------------------------------------------------------------------------------------------------------------------------------------------------------|-------------|
| Makris, 2007, Greece, Ref 58* | To evaluate the 18 patients with COPD (ex-smokers). concentrations of 8-isoprostane in EBC of patients with stable COPD and to investigate whether there is any relationship between 8-isoprostane levels and main parameters of the disease such as symptoms, stage of severity, emphysematous changes and airway inflammation. | 12 healthy individuals 3 males and 9 females, their mean age±SD 61±3.5§ | EBC was collected using a specially designed double-jacketed glass tube. Subjects, breathed for 10 min, while using noseclips. One ml of breath condensate was stored at – 70 ° C. | EBC 8-isoprostane levels may reflect the extension of lung emphysema in COPD patients. In this respect, further investigation is required in order to evaluate the possible role of EBC 8-isoprostane in assessing disease progress in COPD patients. | 18 Moderate |
|-------------------------------|----------------------------------------------------------------------------------------------------------------------------------------------------------------------------------------------------------------------------------------------------------------------------------------------------------------------------------|-------------------------------------------------------------------------|------------------------------------------------------------------------------------------------------------------------------------------------------------------------------------|-------------------------------------------------------------------------------------------------------------------------------------------------------------------------------------------------------------------------------------------------------|-------------|

|                                        |                                                                                                                                                                  |                                                   |                                                                                                                                                                                                                                                                                                      |                                                                                                                                                                              |                                                                                                                                                                                                                                                                                                        |             |
|----------------------------------------|------------------------------------------------------------------------------------------------------------------------------------------------------------------|---------------------------------------------------|------------------------------------------------------------------------------------------------------------------------------------------------------------------------------------------------------------------------------------------------------------------------------------------------------|------------------------------------------------------------------------------------------------------------------------------------------------------------------------------|--------------------------------------------------------------------------------------------------------------------------------------------------------------------------------------------------------------------------------------------------------------------------------------------------------|-------------|
| Marie-Desvergne, 2018, France, Ref 59* | To evaluate the suitability and efficiency of the SensAbues (SB) for collecting 8-isoprostane, in comparison with exhaled breath condensate collection using RT. | NA                                                | Seven volunteers were recruited among the laboratory staff. Volunteers were mainly women (six women and one man), non-smokers (5 non-smokers and 2 smokers) and aged $37 \pm 12$ years. All of them were healthy with no respiratory inflammation or fever reported at the time of the collections.§ | The sampling with the RT was performed for 15 minutes, with a nose-clip. The EBC was immediately frozen at $-80^{\circ}\text{C}$ after collection in the RT collection tube. | This is the first study to report the ability of the SB device to collect and measure 8-isoprostane in exhaled breath. The proposed method offers better sensitivity than a classical collection with the RT device and should be further explored before future application in biomonitoring studies. | 11 Low      |
| Mazur, 2009, Finland, Ref 60*          | To compare the relative proportions of 2 potent biomarkers, IL-8 and 8-isoprostane, in the induced sputum and EBC sampled from the same subjects nonsmokers,     | Nine smokers (mean 52 pack years) with symptoms.§ | 14 healthy nonsmokers(3 female, mean age $\pm$ SD $57\pm4.2$ ) and 17 healthy smokers (5 female, mean age $\pm$ SD $43\pm12.6$ )§                                                                                                                                                                    | EBC was collected using EcoScreen with patients breathing at tidal volume for 15 min. Condensate was immediately stored at $-80^{\circ}\text{C}$ for subsequent analysis.    | The levels of both potential markers were clearly higher in the induced sputum than in EBC. The results point to an advantage of                                                                                                                                                                       | 15 Moderate |



nonsymptomatic smokers and symptomatic smokers who are considered to be at risk for COPD.

induced sputum over EBC for assessing the degree of airway oxidative stress and inflammation in smokers with a potential risk for COPD development.

|                             |                                                                                                                                                                                                                                                                                           |                                                                                                                                                                                                                                                                                                    |                                                                                                                                                                                                                                                 |             |
|-----------------------------|-------------------------------------------------------------------------------------------------------------------------------------------------------------------------------------------------------------------------------------------------------------------------------------------|----------------------------------------------------------------------------------------------------------------------------------------------------------------------------------------------------------------------------------------------------------------------------------------------------|-------------------------------------------------------------------------------------------------------------------------------------------------------------------------------------------------------------------------------------------------|-------------|
| Montuschi, 1999, UK, Ref 3* | To investigate whether 12 patients with mild asthma, 17 with moderate asthma, and 15 with severe asthma were studied to compare its concentrations in these patients with those in healthy subjects. The use of breath condensate is a noninvasive means for collecting airway secretions | Healthy control subjects (n=10, mean age 34.1, 4 females)§ collected in a specially designed glass condensing chamber. subjects breathed isoprostane and tidally through a lung function mouthpiece connected to the condenser for 15 min while wearing noseclips. Condensate was stored at -70°C. | EBC samples were There was no correlation between 8-isoprostane and tests in any group of patients. Our study shows that oxidative stress is increased in asthmatic subjects as reflected by 8-isoprostane concentrations in breath condensate. | 17 Moderate |
|-----------------------------|-------------------------------------------------------------------------------------------------------------------------------------------------------------------------------------------------------------------------------------------------------------------------------------------|----------------------------------------------------------------------------------------------------------------------------------------------------------------------------------------------------------------------------------------------------------------------------------------------------|-------------------------------------------------------------------------------------------------------------------------------------------------------------------------------------------------------------------------------------------------|-------------|

|                                                         |                                                                                                                                                                                                                                                                      |                                                                                   |                                                                                                                                                                                 |                                                                                                                                                                                                    |                                                                                                                                        |             |
|---------------------------------------------------------|----------------------------------------------------------------------------------------------------------------------------------------------------------------------------------------------------------------------------------------------------------------------|-----------------------------------------------------------------------------------|---------------------------------------------------------------------------------------------------------------------------------------------------------------------------------|----------------------------------------------------------------------------------------------------------------------------------------------------------------------------------------------------|----------------------------------------------------------------------------------------------------------------------------------------|-------------|
| Paolo Montuschi, To investigate if NA 2002, UK, Ref 61* | oxidant stress, as reflected by exhaled 8-isoprostane, is affected by short-term ozone exposure and the effect of inhaled budesonide on free radical production after ozone exposure.                                                                                | Nine healthy subjects were studied (four men and five women; mean age: 30 years)§ | 9 healthy subjects were studied (4 men and 5 women, all nonsmokers)                                                                                                             | Short-term ozone exposure causes acute increase in lung oxidative stress as reflected by exhaled 8-isoprostane. This increase is resistant to pretreatment with a high dose of inhaled budesonide. | 14 Moderate                                                                                                                            |             |
| Papaioannou, 2010, Greece, Ref 62*                      | asthmatic patients. To evaluate the acute effect of cigarette smoking on biomarkers of airway and systemic inflammation and oxidative stress in patients with well-controlled moderate persistent asthma on proper treatment and in properly matched normal smokers. | Ten patients with moderate persistent asthma were included in the study.          | Ten otherwise normal smokers, age and sex-matched with similar smoking habit with the asthmatics served as controls. They were normal smokers (4 females, mean age±SD 35.4±14)§ | EBC was collected using EcoScreen. Subjects were asked to perform tidal breathing for 20 min while wearing a nose clip. Samples were stored in -80°C                                               | Acute smoking has more deleterious effects in well-controlled properly treated asthmatic smokers compared with matched normal smokers. | 19 Moderate |

|                                             |                                                                                                                         |                                                                                                                                                           |                                                                                         |                                                                                                                                                                                                         |                                                                                                                                                                                                                          |             |
|---------------------------------------------|-------------------------------------------------------------------------------------------------------------------------|-----------------------------------------------------------------------------------------------------------------------------------------------------------|-----------------------------------------------------------------------------------------|---------------------------------------------------------------------------------------------------------------------------------------------------------------------------------------------------------|--------------------------------------------------------------------------------------------------------------------------------------------------------------------------------------------------------------------------|-------------|
| Pękala-Wojciechowska, 2018, Poland, Ref 63* | To measure oxidative stress in type 1 diabetes by the concentration of 8-isoprostanes in the exhaled breath condensate. | Patients with type 1 diabetes without complications group (n=10) and type 1 diabetes group with advanced complications (n=11) were included in the study. | The control group consisted of 12 healthy persons (2 men, age median/min-max 34/25-60)§ | EBC was obtained for each patient by means of the EcoScreen condenser. Each of the subjects was asked to calmly breathe for 10 minutes using a condenser. The resulting material was frozen at -80 ° C. | Measurement of 8-isoprostanes in the EBC in patients with type 1 diabetes does not appear to be a good diagnostic tool for monitoring the activity of oxidative stress in these patients.                                | 12 Low      |
| Pelclova, 2011, Czech Republic, Ref 67      | To evaluate the potential impact of lung fibrosis on the levels of the oxidative stress markers in blood and urine.     | 37 patients, formerly exposed to silica (36 men, 1 woman, mean age 69.1 ± 2.9; 13.5% smokers).                                                            | 29 control subjects (20 men, 9 women, mean age 67.0 ± 4.6 yr; 13.8% smokers)            | EBC collection was performed with EcoScreen. All subjects (wearing a nose-clip) breathed tidally and samples were immediately frozen to -80°C.                                                          | The influence of satisfactorily controlled systemic disorders on markers in EBC in patients with pneumoconioses is not significant. In addition to oxidative stress markers in EBC, lung fibroses may increase oxidative | 15 Moderate |

stress markers in  
plasma and urine.

|                                        |                                                                                                                                                                                                                       |                                                                                                                                                                                                                                |                                                                                                                                                                                                                                                                |             |
|----------------------------------------|-----------------------------------------------------------------------------------------------------------------------------------------------------------------------------------------------------------------------|--------------------------------------------------------------------------------------------------------------------------------------------------------------------------------------------------------------------------------|----------------------------------------------------------------------------------------------------------------------------------------------------------------------------------------------------------------------------------------------------------------|-------------|
| Pelclova, 2014, Czech Republic, Ref 68 | To search for optimal markers in the EBC, plasma and urine that would reflect the severity of occupational asthma withdrawal from the (OA) and distinguish between a stable asthma and asthma with signs of activity. | 43 subjects with Control group consisted of 20 subjects, working as office or health care employees and having no symptoms of asthma (10 clip) breathed tidally and samples were immediately frozen to $-80^{\circ}\text{C}$ . | EBC was collected within 15–20 min in OA is very slow and objective impairments persist years after removal from the exposure. Cysteinyl LTs and 8-ISO in EBC and 8-ISO in plasma might enrich the spectrum of useful objective tests for the follow-up of OA. | 18 Moderate |
|----------------------------------------|-----------------------------------------------------------------------------------------------------------------------------------------------------------------------------------------------------------------------|--------------------------------------------------------------------------------------------------------------------------------------------------------------------------------------------------------------------------------|----------------------------------------------------------------------------------------------------------------------------------------------------------------------------------------------------------------------------------------------------------------|-------------|

|                                        |                                                                                                                                                                                                                                  |                                                                                   |                                                                                                                                                                                  |                                                                                                                                                                                      |                                                                                                                                                                                                                                                           |             |
|----------------------------------------|----------------------------------------------------------------------------------------------------------------------------------------------------------------------------------------------------------------------------------|-----------------------------------------------------------------------------------|----------------------------------------------------------------------------------------------------------------------------------------------------------------------------------|--------------------------------------------------------------------------------------------------------------------------------------------------------------------------------------|-----------------------------------------------------------------------------------------------------------------------------------------------------------------------------------------------------------------------------------------------------------|-------------|
| Pelclova, 2012, Czech Republic, 66     | To study the possible adverse health-effects in workers exposed to TiO <sub>2</sub> aerosol through non-invasive method such as the analysis of markers of oxidative stress and inflammation in EBC and the measurement of FeNO. | 20 workers exposed to TiO <sub>2</sub> aerosol (males, 11 smokers, 9 nonsmokers). | 19 controls (males, 11 smokers, 8 nonsmokers).                                                                                                                                   | EBC samples collected using Ecoscreen. Nose breathing was eliminated by nose clips.                                                                                                  | This first in-vivo study in workers suggests adverse effects of chronic exposure to TiO <sub>2</sub> aerosol including nano-sized fractions.                                                                                                              | 17 Moderate |
| Pelclova, 2016, Czech Republic, Ref 70 | To evaluate markers of oxidative stress in the EBC of workers exposed to iron oxide nanoparticles during iron oxide pigment production and their association with workplace environments.                                        | 14 workers (males, 43 ± 7 years, 43% smokers) exposure to iron oxides.            | The control group was composed of 14 males (39 ± 4 years, 50% smokers), who were not employed in this factory and were not exposed occupationally to dust or other health risks. | EBC samples were collected using Ecoscreen Turbo. All subjects breathed tidally for about 15 min while wearing a noseclip. All samples were immediately frozen and stored at −80 °C. | The adverse effects of nano iron oxide aerosol exposure and support the utility of oxidative stress biomarkers in EBC. The analysis of urine oxidative stress biomarkers does not support the presence of systemic oxidative stress in iron oxide pigment | 16 Moderate |

production  
workers.

|                                        |                                                                                                                                                                 |                                                                                    |                                                                                                                                                                                                    |                                                                                                                                                                                                                              |             |
|----------------------------------------|-----------------------------------------------------------------------------------------------------------------------------------------------------------------|------------------------------------------------------------------------------------|----------------------------------------------------------------------------------------------------------------------------------------------------------------------------------------------------|------------------------------------------------------------------------------------------------------------------------------------------------------------------------------------------------------------------------------|-------------|
| Pelclova, 2017, Czech Republic, Ref 71 | To investigate the impact of such short-term exposures on the markers of health effects in office workers relative to production workers from the same factory. | 22 male office employees exposed to TiO <sub>2</sub> working in the same building. | Seven male control subjects mean age $\pm$ SD 38.5 $\pm$ 4.5 years, they werenot employed in the factory. They worked as healthcare personnel and technical staff and did not handle nanomaterials | EBC samples were collected using Ecoscreen Turbo. All subjects both production and office employees in the factories with nanoparticle exposure, and a more detailed chemical analysis of their workplace aerosol is needed. | 16 Moderate |
|----------------------------------------|-----------------------------------------------------------------------------------------------------------------------------------------------------------------|------------------------------------------------------------------------------------|----------------------------------------------------------------------------------------------------------------------------------------------------------------------------------------------------|------------------------------------------------------------------------------------------------------------------------------------------------------------------------------------------------------------------------------|-------------|

|                                  |                                                                                                                                                                                                          |                                                                                                                                                                                                                                                                       |                                                                                                                                                                                                                                                  |                                                                                                                                                                                      |                                                                                                                                                                                                                                                                                                                              |             |
|----------------------------------|----------------------------------------------------------------------------------------------------------------------------------------------------------------------------------------------------------|-----------------------------------------------------------------------------------------------------------------------------------------------------------------------------------------------------------------------------------------------------------------------|--------------------------------------------------------------------------------------------------------------------------------------------------------------------------------------------------------------------------------------------------|--------------------------------------------------------------------------------------------------------------------------------------------------------------------------------------|------------------------------------------------------------------------------------------------------------------------------------------------------------------------------------------------------------------------------------------------------------------------------------------------------------------------------|-------------|
| Pelclova, Czech Republic, Ref 72 | 2017, To expand the spectrum of investigation to markers of lipid oxidation both in EBC and urine and to identify the most robust oxidative stress markers for routine biomonitoring of exposed workers. | Workers working with 45 male controls, with a mean age of 34.2 (CI 31.5–36.9) years; 40.0% were smokers and 100.0% were daily alcohol users. They were not occupationally exposed to TiO <sub>2</sub> , dusts, or other hazardous substance (divided into subgroups). | 45 male controls, with a mean age of 34.2 (CI 31.5–36.9) years; 40.0% were smokers and 100.0% were daily alcohol users. They were not occupationally exposed to TiO <sub>2</sub> , dusts, or other hazardous substance (divided into subgroups). | EBC samples were collected using Ecoscreen Turbo. All subjects breathed tidally for about 15 min while wearing a noseclip. All samples were immediately frozen and stored at –80 °C. | A significant dose-dependent association was found between exposure to TiO <sub>2</sub> and markers of lipid oxidation in the EBC. These markers were not elevated in the urine samples. Lipid oxidation in the EBC of workers exposed to (nano)TiO <sub>2</sub> complements our earlier findings on DNA and protein damage. | 16 Moderate |
| Pelclova, Czech Republic, Ref 69 | 2018, To investigate the information concerning respiratory findings in TCDD intoxication                                                                                                                | Eight male survivors (mean age 72.4 ± 1.3 years) from 80 workers intoxicated with TCDD during the production of herbicides from 1965 to 1968.                                                                                                                         | The healthy control group included 7 men (66.0 ± 16 years), five were smokers (71.4%), and two non-smokers.                                                                                                                                      | EBC samples were collected using Ecoscreen Turbo. All subjects breathed tidally for about 15 min while wearing a noseclip. All samples were immediately frozen and stored at –80 °C. | Differences in the expression of the biomolecular markers in EBC as compared to controls were not associated with lung impairments                                                                                                                                                                                           | 13 Low      |

and the respiratory parameters measured.

Piotrowski, 2007, To assess the 28 sarcoidosis patients (10 17 healthy, nonatopic EBC was collected using a The positive 18 Moderate  
Poland, Ref 73 differences in levels of women; mean age, 39.18 neversmokers (8 women; commercial device correlation of EBC  
eicosanoids (ie, CysLT, years). mean age, 39.82 years). (Ecoscreen). Patients were 8-isoprostane and  
LTB4, and 8- asked to breath out BALF CysLT concentrations  
isoprostane) in EBC of spontaneously for 10 min. concentrations  
sarcoidosis patients with the percentage of  
and healthy subjects. clip. eosinophils in  
Samples were stored at 80°C. The collection of EBC BALF, and the  
higher percentage  
of eosinophils in  
BALF from  
patients with  
grade 3  
sarcoidosis, may  
suggest the  
possible  
prognostic value.



|                                  |                                                                                                                            |                                                                                            |                                                                                                                                          |                                                                                                                                                                                                                         |                                                                                                                                                                                                              |             |
|----------------------------------|----------------------------------------------------------------------------------------------------------------------------|--------------------------------------------------------------------------------------------|------------------------------------------------------------------------------------------------------------------------------------------|-------------------------------------------------------------------------------------------------------------------------------------------------------------------------------------------------------------------------|--------------------------------------------------------------------------------------------------------------------------------------------------------------------------------------------------------------|-------------|
| Piotrowski, 2010, Poland, Ref 75 | To evaluate the clinical value of EBC 8-Isoprostane in sarcoid patients, followed over a period of 6-12 months.            | 40 caucasian patients (23 women, age $39 \pm 11$ ) with sarcoidosis were include           | 34 healthy never smokers (19 women, age $45 \pm 10$ ), members of a hospital staff, free of respiratory infection in the last 4 weeks.   | EBC was collected using a commercial device (Ecoscreen). Patients were asked to breath out spontaneously for 10 min. All subjects wore a nose clip. Samples were stored at $80^{\circ}\text{C}$ . The collection of EBC | Low initial 8-Isoprostane may be a positive prognostic factor. A decrease of 8-Isoprostane in treated patients reflects a non-specific effect of treatment and is not related to mere regression of disease. | 15 Moderate |
| Piotrowski, 2010, Poland, Ref 74 | To evaluate the correlation between both spontaneous and PMA stimulated superoxide anion generation and EBC 8-isoprostane. | 29 patients with newly diagnosed, histopathologically confirmed sarcoidosis were included. | The control group (20 females, mean age 39.8) consisted of 34 healthy never-smokers, members of the hospital staff and medical students. | EBC was collected using a commercial device (Ecoscreen). Patients were asked to breath out spontaneously for 10 min. All subjects wore a nose clip. Samples were stored at $80^{\circ}\text{C}$ .                       | higher concentrations of EBC 8-isoprostane in sarcoidosis and higher spontaneous release of superoxide anion from BALF cells in patients with sarcoidosis. The increase of EBC 8-isoprostane is not          | 15 Moderate |

directly related to  
superoxide anion  
released from  
BALF cells.

|                                  |                                                                                                           |                                                                                                                                                                                                                                                                                                                                        |                                                                                                                              |                                                                                                                                                                                                         |                                                                    |               |
|----------------------------------|-----------------------------------------------------------------------------------------------------------|----------------------------------------------------------------------------------------------------------------------------------------------------------------------------------------------------------------------------------------------------------------------------------------------------------------------------------------|------------------------------------------------------------------------------------------------------------------------------|---------------------------------------------------------------------------------------------------------------------------------------------------------------------------------------------------------|--------------------------------------------------------------------|---------------|
| Piotrowski, 2012, Poland, Ref 76 | To evaluate the usefulness of EBC Isoprostane as a marker of severity and control of severe adult asthma. | 25 severe, never-smoking asthmatics (age: 51.7 ±9.6 years, 17 women) were studied. There were two control groups: 11 healthy never-smokers constituted a healthy control group and 16 newly diagnosed and never-treated, non-smoking mild asthmatics constituted a never-treated asthma control group (age: 32.0 ±8.5 years, 9 women). | There were two control groups: 11 healthy never-smokers constituted a healthy control group (age: 46.6 ±12.3 years, 5 women) | EBC was collected using a commercial device (Ecoscreen). Patients were asked to breathe out spontaneously for 10 min. All subjects wore a nose clip. Samples were stored at 80°C. The collection of EBC | EBC isoprostane measurements are not useful for asthma monitoring. | 8-15 Moderate |
|----------------------------------|-----------------------------------------------------------------------------------------------------------|----------------------------------------------------------------------------------------------------------------------------------------------------------------------------------------------------------------------------------------------------------------------------------------------------------------------------------------|------------------------------------------------------------------------------------------------------------------------------|---------------------------------------------------------------------------------------------------------------------------------------------------------------------------------------------------------|--------------------------------------------------------------------|---------------|

|                                    |                                                                                                                                                                                                                                                                                                                                  |                                                                                                                                                                                                                                                                       |                                                                                                                                                                                                                                                                                                                     |             |
|------------------------------------|----------------------------------------------------------------------------------------------------------------------------------------------------------------------------------------------------------------------------------------------------------------------------------------------------------------------------------|-----------------------------------------------------------------------------------------------------------------------------------------------------------------------------------------------------------------------------------------------------------------------|---------------------------------------------------------------------------------------------------------------------------------------------------------------------------------------------------------------------------------------------------------------------------------------------------------------------|-------------|
| Pirozzi, USA, Ref 78               | 2015, to determine if All participants were naturally occurring adults aged 40–85, all episodes of ozone air pollution are associated with former smokers with increased pulmonary inflammation and oxidative stress, increased respiratory symptoms, and decreased lung function in individuals with COPD compared to controls. | Control group (n = 9), 5 EBC was collected using the R-tube system with both with and without airflow obstruction. The COPD group(n=11) consisted of former smokers without overt chronic lung disease, airflow obstruction, or emphysema on CT imaging. Non-smoking. | 66.8 (±5.6). The control tidal breathing for 10 min. without airflow obstruction. Samples were divided into two groups: one group was frozen at -80 degrees F. developed airway oxidative stress and inflammation in association with ozone air pollution episodes.                                                 | 17 Moderate |
| Cheryl Pirozzi, 2015, USA, Ref 77* | To determine if former smokers with and without airway obstruction differed in their response to naturally occurring PM air pollution episodes                                                                                                                                                                                   | The COPD group(n=16) consisted of former smokers with moderate or severe COPD, 13 males. The control group (n=12), 6 males. and a the control group consisted of former smokers without chronic lung disease, airflow obstruction, or emphysema on CT imaging.§       | EBC was collected using the R-tube system with tidal breathing for 10 min. Samples were divided into two groups: one group was frozen at -80 degrees F. a distinctive response to particulate air pollution episodes compared to former smokers without airflow obstruction, with increased airway inflammation and | 17 Moderate |

respiratory  
symptoms.

|                                  |                                                                                                                                                                                   |                                                                                                 |                                                                                                                                                                                          |                                                                                                                                                                                         |             |
|----------------------------------|-----------------------------------------------------------------------------------------------------------------------------------------------------------------------------------|-------------------------------------------------------------------------------------------------|------------------------------------------------------------------------------------------------------------------------------------------------------------------------------------------|-----------------------------------------------------------------------------------------------------------------------------------------------------------------------------------------|-------------|
| Psathakis, 2003, Greece, Ref 80* | To measure the levels of 8-isoprostane in the expired breath condensate of patients with sarcoidosis, and to investigate the relation of 8-isoprostane level to disease activity. | 30 patients with healthy control subjects 12 males and 7 females, mean age $\pm$ SD 39 $\pm$ 9§ | 5 EBC was collected in the morning using an alternative way of cooling the tubes. subjects were wearing nose clips and breathed for 10 min. The samples were immediately stored at -70°C | 8-isoprostane levels are increased in the expired breath condensate of patients with sarcoidosis and might serve as an index of disease activity.                                       | 14 Moderate |
| Psathakis, 2006, Greece, Ref 79* | To measure the levels of H <sub>2</sub> O <sub>2</sub> and 8-isoprostane, as biomarkers of oxidative stress, in the EBC of patients with idiopathic pulmonary fibrosis (IPF).     | 16 patients with IPF(9 males, mean age $\pm$ SD 67 $\pm$ 7 mean age $\pm$ SD 56 $\pm$ 9§        | 9 EBC was collected in the morning using an alternative way of cooling the tubes. subjects were wearing nose clips and breathed for 10 min. The samples were immediately stored at -70°C | H <sub>2</sub> O <sub>2</sub> and 8-isoprostane are increased in the EBC of patients with IPF. H <sub>2</sub> O <sub>2</sub> may be correlated with the severity of the disease in IPF. | 14 Moderate |

|                               |                                                                                                                                                                           |                                                                                                                                                                                                                                                                        |                                                                                                                                                                                                                                                                            |                                                                                                                                                                     |                                                                                                                                                                                    |             |
|-------------------------------|---------------------------------------------------------------------------------------------------------------------------------------------------------------------------|------------------------------------------------------------------------------------------------------------------------------------------------------------------------------------------------------------------------------------------------------------------------|----------------------------------------------------------------------------------------------------------------------------------------------------------------------------------------------------------------------------------------------------------------------------|---------------------------------------------------------------------------------------------------------------------------------------------------------------------|------------------------------------------------------------------------------------------------------------------------------------------------------------------------------------|-------------|
| Radulovic, 2015, USA, Ref 81* | To compare levels of biomarkers of inflammation in exhaled breath condensate (EBC) and serum in subjects with chronic tetraplegia, mild asthma, and able-bodied controls. | Patients with tetraplegia (n = 12), asthma (n = 12) were included.                                                                                                                                                                                                     | Ten healthy able-bodied controls (all males, mean age±SD 48 ± 10)§                                                                                                                                                                                                         | EBC was collected using an EcoScreen EBC collector. Participants were asked to perform resting tidal breathing for 15 min. Samples were immediately stored at −80°. | Through analysis of EBC, levels of 8-IP were significantly elevated compared to levels found in individuals with mild asthma and healthy controls.                                 | 16 Moderate |
| Romero, 2005 , Spain, Ref 82  | To determine whether analysis of exhaled breath condensate from patients with severe lung infections reveals changes in the redox state at the airway surface.            | 48 subjects divided into 4 groups: individuals without disease (n=14), patients with multilobar pneumonia (n=13), patients who had chronic obstructive pulmonary disease with superinfection (n=14), and mechanically ventilated patients with severe pneumonia (n=7). | The control group (12 males, age±SD 62.86±2.96) was made up of 14 patients admitted for scheduled surgery who had no prior history of respiratory disease, had a normal chest radiograph, and who were either nonsmokers or had given up smoking at least 2 years earlier. | EBC was collected using an ANACON condenser. Collection time was over a period of at least 15 minutes. The aliquots were stored at −80°C prior to analysis.         | Analysis of the concentrations of 8-isoprostane and MPO in exhaled breath condensate allows assessment of oxidative stress in the airways of patients with severe lung infections. | 12 Low      |

|                                                                                                                                                                                                                                                                                                                                                                        |                                                                                                                   |                                                                                                                                      |                                                                                                                                                                                                                                            |             |
|------------------------------------------------------------------------------------------------------------------------------------------------------------------------------------------------------------------------------------------------------------------------------------------------------------------------------------------------------------------------|-------------------------------------------------------------------------------------------------------------------|--------------------------------------------------------------------------------------------------------------------------------------|--------------------------------------------------------------------------------------------------------------------------------------------------------------------------------------------------------------------------------------------|-------------|
| Rosias, 2006, To investigate the NA<br>Netherlands, Ref influence of different<br>84 inner condenser<br>coating surfaces<br>(silicone, borosilicate<br>glass, aluminium,<br>polypropylene, Teflon<br>and EcoScreen1 with a<br>Teflon-like coating) on<br>the measurement of 8-<br>isoprostane and<br>albumin in EBC using<br>both an in vitro and in<br>vivo approach. | 28 healthy volunteers age<br>median range 26(20–57),<br>10 were males and 18<br>females. 5 were smokers.          | Each subject was asked to<br>breathe tidally, while<br>wearing a nose-clip and<br>exhaled for 15 min.Samples<br>were stored at –80°. | A condenser with<br>silicone or glass<br>coating is more<br>efficient for<br>measurement of<br>8- isoprostane or<br>albumin in<br>exhaled breath<br>condensate, than<br>EcoScreen1,<br>aluminium,<br>polypropylene or<br>Teflon.           | 14 Moderate |
| Rosias, 2008, to assess NA<br>Netherlands, Ref reproducibility of EBC<br>83* volume, hydrogen<br>peroxide (H2O2), 8-<br>isoprostane and<br>cytokine<br>measurements using<br>different condensers,<br>including a newly<br>developed glass<br>condenser                                                                                                                | 30 healthy volunteers age<br>median range 23 (22–<br>36),19 were males and 11<br>females. 28 were<br>nonsmokers.§ | Each subject was asked to<br>breathe tidally, while<br>wearing a nose-clip and<br>exhaled for 15 min.Samples<br>were stored at –80°. | Significantly<br>more EBC volume<br>and biomarker<br>detections were<br>found using the<br>optimised glass<br>condenser.<br>Biomarker<br>reproducibility in<br>EBC in healthy<br>adults was not<br>influenced by the<br>type of condenser. | 15 Moderate |

|                          |                                                                                                                                                                                                             |                                                                                 |                                                     |         |                                                                                                                                                                                 |                                                                                                                                                                                                                    |             |
|--------------------------|-------------------------------------------------------------------------------------------------------------------------------------------------------------------------------------------------------------|---------------------------------------------------------------------------------|-----------------------------------------------------|---------|---------------------------------------------------------------------------------------------------------------------------------------------------------------------------------|--------------------------------------------------------------------------------------------------------------------------------------------------------------------------------------------------------------------|-------------|
| Samitas, Greece, Ref 85* | 2009, To investigate baseline values of inflammatory lipid mediators in EBC and their relation to asthma severity                                                                                           | 16 mild, 12 moderate and 15 severe asthmatics were studied.                     | Healthy subjects(n=19, 12 females, age mean=47)§    | control | EBC was collected in the morning using ECoScreen. All subjects breathed for 10 min not wearing a noseclip. Condensate was immediately stored at 80°C.                           | 8-isoprostane and cys-LT are detectable in EBC of healthy subjects and their levels progressively increase in asthmatic patients according to disease severity.                                                    | 17 Moderate |
| Sanak, Poland, Ref 86    | 2011, To assess a vast platform of eicosanoids in whom had different asthma phenotypes, including aspirin-intolerant asthma, by means of a recently developed analytic approach based on mass spectrometry. | 115 asthmatic subjects, 62 (41 female subjects) of whom had AIA were recruited. | 62 healthy group(n=38, 12 males, age±SD 43.03±13.1) | control | Collections of EBC were carried out with the ECO Screen I after tidal breathing for 15 minutes, 2 mL of clear fluid was collected and immediately transferred on ice to a -70°C | The highly sensitive eicosanoid profiling in EBC makes it possible to detect alterations in asthma, especially in its distinct phenotype characterized by hypersensitivity to aspirin and other nonsteroidal anti- | 16 Moderate |

inflammatory  
drugs.

|                               |                                                                                                                                                                                                          |                                                                                                                                     |                                                                                                                 |                                                                                                                                                                                                                             |                                                                                                                                                       |             |
|-------------------------------|----------------------------------------------------------------------------------------------------------------------------------------------------------------------------------------------------------|-------------------------------------------------------------------------------------------------------------------------------------|-----------------------------------------------------------------------------------------------------------------|-----------------------------------------------------------------------------------------------------------------------------------------------------------------------------------------------------------------------------|-------------------------------------------------------------------------------------------------------------------------------------------------------|-------------|
| Santini, 2016, Italy, Ref 87* | Comparing exhaled and non-exhaled non-invasive markers of respiratory inflammation in currentsmokers patients with COPD included and healthy subjects and define their relationships with smoking habit. | 48 patients with stable COPD who were ex-smokers, 17 patients with stable COPD who were smokers(9 males, mean age 56) were studied. | 12 healthy current smokers(10 males, mean age 48) and 12 healthy ex-smokers(9 males, mean age 56) were studied. | EBC was collected using the Ecoscreen. Subjects breathed tidally for 15 minutes. EBC samples were stored at -80°C.                                                                                                          | biological meaning of these inflammatory markers depends on type of marker and biological matrix in which is measured.                                | 16 Moderate |
| Shimizu, 2007, Japan, Ref 88  | To determine the usefulness of measurement of the acid stress marker pH and the oxidative stress marker 8-isoprostane by EBC in proton pump inhibitor (PPI) therapy effect on                            | 36 patients with asthma(17 males, mean age 45.2)                                                                                    | 26 control subjects(13 males, mean age 46.7)                                                                    | EBC was collected using an ECoScreen. The collection was performed from 9: 00 to 11: 00 h in the morning. The subjects were asked to breathe tidally for 15 min, while wearing a nose clip. Samples were stored at -70 ° C. | Measurement of the pH and 8-isoprostane level of EBC may be useful to evaluate the influence of GERD on asthma, as well as to determine the timing of | 16 Moderate |



moderate asthma  
patients with GERD.

intermittent PPI  
therapy.

|                                 |                                                                                                                                                        |                                                                  |                                                                                                                                                                                                   |                                                                                                                                                                                                                            |                                                                                                                                                                                                                                                                                             |        |
|---------------------------------|--------------------------------------------------------------------------------------------------------------------------------------------------------|------------------------------------------------------------------|---------------------------------------------------------------------------------------------------------------------------------------------------------------------------------------------------|----------------------------------------------------------------------------------------------------------------------------------------------------------------------------------------------------------------------------|---------------------------------------------------------------------------------------------------------------------------------------------------------------------------------------------------------------------------------------------------------------------------------------------|--------|
| Syslova, Czech Republic, Ref 91 | 2010, To test a rapid and easy method for monitoring oxidative stress markers in body fluids of patients with asbestos or silica-induced lung diseases | Patients (n=20) diagnosed with occupational respiratory diseases | The control group (n=10) of healthy non-smokers was subjects with no medical record of occupational exposure to fibrogenic dusts. Their mean age $\pm$ SD 63 $\pm$ 5 years and they were all men. | EcoScreen was used to collect the samples of EBC. The subjects were asked to breathe for 5–10min while wearing a nose-clip. All clinical samples were collected between 8 and 12 a.m. The EBC sample was frozen to -80 °C. | The method was tested on samples obtained from patients diagnosed with asbestosis, pleural hyalinosis or silicosis, and then compared to samples from healthy subjects. The difference in concentration levels of biomarkers between the two groups was perceptible in all the body fluids. | 13 Low |
|---------------------------------|--------------------------------------------------------------------------------------------------------------------------------------------------------|------------------------------------------------------------------|---------------------------------------------------------------------------------------------------------------------------------------------------------------------------------------------------|----------------------------------------------------------------------------------------------------------------------------------------------------------------------------------------------------------------------------|---------------------------------------------------------------------------------------------------------------------------------------------------------------------------------------------------------------------------------------------------------------------------------------------|--------|

|                                 |                                                                                                                                                                                                                                                                                                                                                     |                                                                                                                                                                                          |                                                                                        |                                                                                                                                                                  |                                                                                                                                                                                                                                                                     |             |
|---------------------------------|-----------------------------------------------------------------------------------------------------------------------------------------------------------------------------------------------------------------------------------------------------------------------------------------------------------------------------------------------------|------------------------------------------------------------------------------------------------------------------------------------------------------------------------------------------|----------------------------------------------------------------------------------------|------------------------------------------------------------------------------------------------------------------------------------------------------------------|---------------------------------------------------------------------------------------------------------------------------------------------------------------------------------------------------------------------------------------------------------------------|-------------|
| Syslova, Czech Republic, Ref 90 | 2009, A highly selective and sensitive method is presented for the quantification of 8-iso-PGF2 $\alpha$ , o-Tyr and 8-OHdG in EBC as significant biomarkers of oxidative stress in vivo. The method was tested on real clinical samples collected from patients diagnosed with asbestosis, silicosis and on the control group of healthy subjects. | Ten patients(male, non-smokers) with occupational lung diseases (either silica- or asbestos-induced disorders due to mean $\pm$ 6 years of occupational exposure to silica or asbestos). | Ten subjects(male, non-smokers) without any occupational exposure to fibrogenic dusts. | EcoScreen was used to collect the samples of EBC. The subjects wear asked to breathe for 5–10min while wearing a nose-clip. The EBC sample was frozen to -80 °C. | The difference in biomarkers' concentration levels found between the two groups was statistically significant. A significant increase in the 8-OHdG biomarker present in EBC was found in patients previously exposed to carcinogenic minerals asbestos and silica. | 15 Moderate |
| Tanou, Greece, Ref 92*          | 2009, To evaluate the impact of smoking on allergic rhinitis and inflammatory and oxidative stress biomarkers in patients with seasonal allergic rhinitis, using non-                                                                                                                                                                               | 40 patients with seasonal allergic rhinitis (20 smokers and 20 non-smokers)                                                                                                              | 30 healthy subjects (15 smokers and 15 non-smokers)                                    | EBC samples were collected using an Ecoscreen. Subjects were asked to breathe for 15 min while wearing a nose clip. Samples of EBC were stored at -70°C          | Patients with allergic rhinitis present increased LTB4 and 8-isoprostane in their nasal cavity, however, with no significant                                                                                                                                        | 19 Moderate |

|                                      |                                                                                                                                              |                                                                                                                                     |                                                                                                                                                     |                                                                                                                                                                                       |             |
|--------------------------------------|----------------------------------------------------------------------------------------------------------------------------------------------|-------------------------------------------------------------------------------------------------------------------------------------|-----------------------------------------------------------------------------------------------------------------------------------------------------|---------------------------------------------------------------------------------------------------------------------------------------------------------------------------------------|-------------|
|                                      | invasive methods for sample collection.                                                                                                      |                                                                                                                                     |                                                                                                                                                     | differences between smokers and non-smokers.                                                                                                                                          |             |
| Tufvesson, 2010, Sweden, Ref 93      | To investigate the amount of LTs and 8-isoprostane, a marker of oxidative stress, in EBCfrom SSc patients.                                   | 22 SSc patients with 16 healthy controls were enrolled<br>median disease duration of 2.1 years were investigated.                   | EBC was collected using an ECoScreen. Subjects were asked to breathe tidally for 15 min, wearing a nose clip. The condensates were stored at -70°C. | Increased levels of CysLT and 8-isoprostane in EBC from patients with SSc reflect the inflammatory pattern involving LTs as well as oxidative stress.                                 | 14 Moderate |
| Van Hoydonck, 2004, Belgium, Ref 94* | To determine 8- isoprostane and hydrogen peroxide levels in EBC, and, in addition, to investigate the reproducibility of these measurements. | NA<br>The study population consisted of 12 male smokers (age range 24–61 yrs; mean±SD 44±14 yrs). All of the smokers were healthy.§ | EBC was collected using an ECoScreen. Subjects were asked to breathe tidally for 15 min, wearing a nose clip. The condensates were stored at -80°C. | Levels of 8-isoprostane and hydrogen peroxide cannot be reproducibly assessed in exhaled breath condensate from healthy smokers because of their low concentration and/or the lack of | 10 Low      |

sensitivity of the  
available assays.

Wu, 2019, USA, To determine acute 12 healthy wildland NA  
Ref 96 pulmonary responses firefighters (9 males and 3  
among the firefighters females with an average  
following the WF age of 33 years) were  
smoke exposure. recruited.

EBC was collected using Results show only  
RTube. Each firefighter a marginal cross-  
was instructed to breathe shift increase in 8-  
spontaneously for 10 min. isoprostane on  
The samples were stored at burn days (.05<p  
-80°C. value < .1),  
suggesting WF  
smoke exposure  
causes mild  
pulmonary  
responses.

11 Low

|                      |                                                                                                                                                                                                                                                                                           |                                                                                                                                                                                                                                                                                                                                                                              |                                                                                                                                                                                                                                               |             |
|----------------------|-------------------------------------------------------------------------------------------------------------------------------------------------------------------------------------------------------------------------------------------------------------------------------------------|------------------------------------------------------------------------------------------------------------------------------------------------------------------------------------------------------------------------------------------------------------------------------------------------------------------------------------------------------------------------------|-----------------------------------------------------------------------------------------------------------------------------------------------------------------------------------------------------------------------------------------------|-------------|
| Zhang, China, Ref 97 | 2013, To examine several NA prominently hypothesized mechanisms by assessing Beijing residents' biologic responses, at the biomarker level, to drastic changes in air quality brought about by unprecedented air pollution control measures implemented during the 2008 Beijing Olympics. | A total of 137 individuals EBC was collected using a Jaeger EcoScreen EBC collector. EBC was collected during the Beijing Olympics were screened, from whom 128 nonsmoking healthy subjects (never-smokers) were enrolled in which time subjects were seated, wearing a nose clip. Among these subjects included in the analysis, 119 completed all of the 6 planned visits. | Changes in air pollution levels were associated with acute changes in biomarkers of pulmonary and systemic inflammation, oxidative stress, and hemostasis and in measures of cardiovascular physiology (HR and SBP) in healthy, young adults. | 14 Moderate |
|----------------------|-------------------------------------------------------------------------------------------------------------------------------------------------------------------------------------------------------------------------------------------------------------------------------------------|------------------------------------------------------------------------------------------------------------------------------------------------------------------------------------------------------------------------------------------------------------------------------------------------------------------------------------------------------------------------------|-----------------------------------------------------------------------------------------------------------------------------------------------------------------------------------------------------------------------------------------------|-------------|

---

\* Studies included in the meta-analysis; § Subgroups included in the meta-analysis; Note. - FLOPs=fluorescent oxidation products, AIA=aspirin-induced asthma, ATA=Aspirin-Tolerant Asthma, LTB4=Leukotriene B4, OSA=Obstructive sleep apnea, PF=pulmonary fibrosis, BALf=bronchoalveolar lavage fluid, nGER=nocturnal gastroesophageal reflux, OSAS=sleep apnea-hypopnea syndrome, BAL=Bronchoalveolar lavage. SAR=seasonal allergic rhinitis, W-EBC=whole EBC, A-EBC=fractionated EBC, WPS=water pipe smoking, DBP=dibutyl phthalate, HFM=high-fat meal, MFM=high-fat meal, CVD=cardiovascular diseases, COPD=Chronic obstructive pulmonary disease, OM=older women, YC=young control, HRCT=high-resolution computed tomography, WBC=white blood cells, RT=Rtube device, SB=SensAbues, OA=occupational asthma, Tio2=Titanium dioxide, IPF=idiopathic pulmonary fibrosis, CT=computed tomography scan, PM=particulate matter, GERD=gastroesophageal reflux disease, PPI=proton pump inhibitor, O-Tyr=oxidized tyrosine, SSc = systematic sclerosis, and WF=wildland fire.

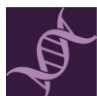

Supplement: s1 [file s1]
